# Supplementary material
Source: PubMed Central journal article supplement (PMC5137188)
Supplement: NIHMS832670-supplement-Supplemental.pdf [file NIHMS832670-supplement-Supplemental.pdf]

## **Analytical and Bioanalytical Chemistry**

### **Electronic Supplementary Material**

#### **Development of urine standard reference materials for metabolites of organic chemicals including polycyclic aromatic hydrocarbons, phthalates, phenols, parabens, and volatile organic compounds**

Michele M. Schantz, Bruce A. Benner, Jr., N. Alan Heckert, Lane C. Sander, Katherine E. Sharpless, Stacy S. Vander Pol, Y. Vasquez, M. Villegas, Stephen A. Wise, K. Udeni Alwis, Benjamin C. Blount, Antonia M. Calafat, Zheng Li, Manori J. Silva, Xiaoyun Ye, Éric Gaudreau, Donald G. Patterson, Jr, Andreas Sjödin

**Table S1** Mass Fractions (ng/g) in SRM 3672

|                   | NIST (n=20) |         | CDC (n=24)   |         | INSPQ (n=4) |         |
|-------------------|-------------|---------|--------------|---------|-------------|---------|
|                   | Mean        | Std Dev | Mean         | Std Dev | Mean        | Std Dev |
| 1-OH-naphthalene  | 33.7        | 1.1     | 37.4         | 2.0     | 29.8        | 2.2     |
| 2-OH-naphthalene  | 8.67        | 0.20    | 8.47         | 0.41    | 8.46        | 0.33    |
| 9-OH-fluorene     | 0.343       | 0.021   | 0.389        | 0.019   | 0.258       | 0.012   |
| 3-OH-fluorene     | 0.426       | 0.014   | 0.431        | 0.022   | 0.403       | 0.005   |
| 2-OH-fluorene     | 0.863       | 0.023   | 0.858        | 0.044   | 0.842       | 0.008   |
| 4-OH-phenanthrene | 0.050       | 0.003   | 0.044        | 0.002   | 0.050       | 0.001   |
| 9-OH-phenanthrene | 0.093       | 0.003   | not reported |         | 0.099       | 0.013   |
| 3-OH-phenanthrene | 0.117       | 0.009   | 0.126        | 0.014   | 0.127       | 0.006   |
| 1-OH-phenanthrene | 0.129       | 0.008   | 0.124        | 0.009   | 0.146       | 0.006   |
| 2-OH-phenanthrene | 0.082       | 0.005   | 0.082        | 0.005   | 0.082       | 0.004   |
| 1-OH-pyrene       | 0.177       | 0.006   | 0.173        | 0.010   | 0.157       | 0.010   |

**Table S2** Mass Fractions (ng/g) in SRM 3673

|                   | NIST (n=20) |         | CDC (n=24)   |         | INSPQ (n=4) |         |
|-------------------|-------------|---------|--------------|---------|-------------|---------|
|                   | Mean        | Std Dev | Mean         | Std Dev | Mean        | Std Dev |
| 1-OH-naphthalene  | 210         | 8       | 233          | 16      | 174         | 14      |
| 2-OH-naphthalene  | 1.34        | 0.07    | 1.31         | 0.06    | 1.25        | 0.10    |
| 9-OH-fluorene     | 0.111       | 0.013   | 0.125        | 0.006   | 0.088       | 0.004   |
| 3-OH-fluorene     | 0.038       | 0.006   | 0.042        | 0.008   | 0.034       | 0.005   |
| 2-OH-fluorene     | 0.112       | 0.010   | 0.105        | 0.006   | 0.100       | 0.003   |
| 4-OH-phenanthrene | 0.011       | 0.001   | 0.010        | 0.001   | 0.010       | 0.000   |
| 9-OH-phenanthrene | 0.011       | 0.001   | not reported |         | 0.012       | 0.001   |
| 3-OH-phenanthrene | 0.031       | 0.005   | 0.031        | 0.023   | 0.028       | 0.002   |
| 1-OH-phenanthrene | 0.048       | 0.006   | 0.043        | 0.003   | 0.053       | 0.001   |
| 2-OH-phenanthrene | 0.023       | 0.004   | 0.022        | 0.002   | 0.028       | 0.001   |
| 1-OH-pyrene       | 0.031       | 0.004   | 0.030        | 0.005   | 0.027       | 0.003   |
